# Supplementary material for: Antibodies against multiple post-translationally modified proteins aid in diagnosis of autoimmune hepatitis and associate with complete biochemical response to treatment
Source: PubMed Central journal article supplement (PMC10411548; doi:10.3389/fmed.2023.1195747), 2023-07-25
Supplement: Presentation_1.pdf [file Presentation_1.pdf]

*Supplementary files.*

**Antibodies against multiple post-translationally modified proteins aid in diagnosis of autoimmune hepatitis and associate with complete biochemical response to treatment**

**Michelle D. van den Beukel<sup>1†</sup>, Anna E.C. Stoelinga<sup>2†</sup>, Adriaan J. van der Meer<sup>3</sup>, Stef van der Meulen<sup>1</sup>, Lu Zhang<sup>1</sup>, Maarten E. Tushuizen<sup>2</sup>, Bart van Hoek<sup>2</sup> and Leendert A. Trouw<sup>1\*</sup>**

*† These authors contributed equally to this work and share first authorship*

**\*Correspondence**

Prof. L. A. Trouw, PhD

Department of Immunology, Leiden University Medical Center

Postbus 9600, 2300 RC Leiden

Telephone: 0031-715263869

Email: [L.A.Trouw@lumc.nl](mailto:L.A.Trouw@lumc.nl)

## Supplementary Tables

**Supplementary Table 1: Characteristics of AIH, PBC and PSC patients in the AILD cohort.** Results are presented as n (%), or median (IQR). *AIH*, autoimmune hepatitis; *ALAT*, alanine aminotransferase; *ALP*, alkaline phosphatase; *AMA*, anti-mitochondrial antibodies; *ANA*, anti-nuclear antibodies; *ASAT*, aspartate aminotransferase; *SMA*, smooth muscle antibody; *CBR*, complete biochemical response; *GGT*, gamma-glutamyl transferase; *IgG*, immunoglobulin gamma; *LKM*, Liver Kidney microsomal antibody; *PBC*, primary biliary cholangitis; *PSC*, primary sclerosing cholangitis; *SLA*, soluble liver antigen. \* pANCA (n=8), anti-parietal cell (n=1) \*\* based on cholangiographic findings with magnetic resonance/endoscopic retrograde cholangiopancreatography.

|                                | AIH (N=66)             | PBC (N=10)            | PSC (N=30)            |
|--------------------------------|------------------------|-----------------------|-----------------------|
| <b>Laboratory assessments</b>  |                        |                       |                       |
| <i>ALAT</i>                    | 338.0 (125.0 - 1057.5) | 37.5 (28.0 – 76.8)    | 54.0 (37.0 – 114.0)   |
| <i>ASAT</i>                    | 420.0 (142.8 - 935.3)  | 50.5 (34.5 – 53.8)    | 48.0 (36.0 – 99.0)    |
| <i>IgG</i>                     | 24.8 (19.4-33.2)       | -                     | -                     |
| <i>ALP</i>                     | 178.5 (123.0 – 279.0)  | 277.0 (158.0 – 433.0) | 229.0 (132.0 – 405.0) |
| <i>GGT</i>                     | 212.0 (116.0 – 371.5)  | 147.0 (58.0 – 571.0)  | 166.0 (96.5 – 278.5)  |
| <b>Positive antibodies</b>     |                        |                       | Insufficient data     |
| <i>ANA</i>                     | 42 (63.6)              | 3 (33.3)              | -                     |
| <i>SMA</i>                     | 35 (53.0)              | -                     | -                     |
| <i>Anti-LKM</i>                | 1 (1.5)                | -                     | -                     |
| <i>Anti-SLA</i>                | 2 (3.0)                | -                     | -                     |
| <i>AMA</i>                     | -                      | 8 (80.0)              | -                     |
| <i>Other*</i>                  | 9 (13.6)               | -                     | -                     |
| <b>Large duct anomalies **</b> | N/A                    | N/A                   | 29 (96.70)            |

**Supplementary Table 2: Prevalence of antibodies against post-translationally modified proteins in patients with autoimmune (n=106) or non-autoimmune liver disease (n=101) and healthy controls (n=100).** Results are presented as median [IQR] or n (%). \*p<0.05, \*\*<0.01 between HC and AILD #p<0.05, ##<0.01 between HC and non-AILD +p<0.05, ++<0.01 between AILD and non-AILD Autoimmune Liver Disease: AIH, PBC and PSC; non-Autoimmune Liver Disease: NAFLD, HCV, HBV, ALD, Combination, NASH. AGE, advanced glycation end-product; AL, acetylated protein; aU/mL, arbitrary units per milliliter; CarP, carbamylated protein; Cit, citrullinated protein; IQR, interquartile range; MAA, malondialdehyde–acetaldehyde adduct; NT, nitrated protein;

|                  | Healthy Controls<br>n=100 |                |  | Autoimmune Liver Disease<br>n=106 |                |  | Non-Autoimmune Liver Disease<br>n=101 |                 |  |
|------------------|---------------------------|----------------|--|-----------------------------------|----------------|--|---------------------------------------|-----------------|--|
|                  | aU/mL [IQR]               | n (% positive) |  | aU/mL [IQR]                       | n (% positive) |  | aU/mL [IQR]                           | n (% positive)  |  |
| <b>Anti-MAA</b>  | 266,9 [200,4 – 370,2]     | 2 (2,0)        |  | 1036,0 [625,5 – 2119,6]**         | 72 (67,9)**    |  | 495,8 [315,2– 726,8]##, ++            | 27 (26,7)##, ++ |  |
| <b>Anti-AGE</b>  | 88,9 [0,0 – 182,5]        | 4 (4,0)        |  | 234,5 [95,5 – 480,5]**            | 39 (36,8)**    |  | 130,0 [4,2 – 261,2]++                 | 18 (17,8)##, ++ |  |
| <b>Anti-CarP</b> | 74,0 [1,5 – 157,9]        | 5 (5,0)        |  | 352,5 [213,5 – 633,0]**           | 50 (47,2)**    |  | 241,0 [83,5 – 422,0]##, +             | 28 (27,7)##, ++ |  |
| <b>Anti-AL</b>   | 0,0 [0,0 – 9,8]           | 5 (5,0)        |  | 13,3 [2,8 – 30,7]**               | 20 (18,9)**    |  | 6,4 [0,0 – 10,0]++                    | 10 (9,9)        |  |
| <b>Anti-Cit</b>  | 1,3 [0,0 – 3,2]           | 6 (6,0)        |  | 3,1 [0,5 – 7,2]*                  | 18 (17,0)*     |  | 1,6 [0,0 – 5,9]                       | 15 (14,9)#      |  |
| <b>Anti-NT</b>   | 108,0 [0,0 – 250]         | 6 (6,0)        |  | 269,0 [33,8 – 602,5]**            | 7 (6,6)        |  | 179 [0,0 – 501,5]                     | 7 (6,9)         |  |

**Supplementary Table 3: The association between the presence of anti-PTM antibodies and the three major autoimmune liver diseases.** Results are presented as median (IQR) of n (%). Chi-2-tests were used to assess the difference between the presence of the specific manifestations and non-AILD patients. \*p=0.006, \*\*p<0.001. *AGE*, advanced glycation end-product; *AIH*, autoimmune hepatitis; *AL*, acetylated protein; *aU/mL*, arbitrary units per milliliter; *CarP*, carbamylated protein; *IQR*, interquartile range; *MAA*, malondialdehyde–acetaldehyde adduct; *non-AILD*, non-autoimmune liver disease; *PBC*, Primary Biliary Cirrhosis; *PSC*, Primary Sclerosing Cholangitis

|                  | <b>AIH</b>       |                  | <b>PBC</b>       |                  | <b>PSC</b>       |                  | <b>Non-AILD (reference)</b> |                 |
|------------------|------------------|------------------|------------------|------------------|------------------|------------------|-----------------------------|-----------------|
|                  | <b>Yes, n=66</b> |                  | <b>Yes, n=10</b> |                  | <b>Yes, n=30</b> |                  | <b>No, n=101</b>            |                 |
| <b>Anti-MAA</b>  |                  |                  |                  |                  |                  |                  |                             |                 |
| aU/mL            | 1519.5           | (760.0 – 2775.3) | 787.6            | (436.3 – 1669.7) | 771.5            | (545.9 – 1223.0) | 495.8                       | (315.2 – 726.8) |
| Positive         | <b>51</b>        | <b>(77.3) **</b> | 5                | (50.0)           | <b>16</b>        | <b>(53.3) *</b>  | 27                          | (26.7)          |
| <b>Anti-AGE</b>  |                  |                  |                  |                  |                  |                  |                             |                 |
| aU/mL            | 349.0            | (156.0 – 537.0)  | 76.5             | (0.0 – 177.9)    | 172.5            | (59.3 – 359.3)   | 130.0                       | (4.2 – 261.2)   |
| Positive         | <b>32</b>        | <b>(48.5) **</b> | 0                | (0.0)            | 7                | (23.3)           | 18                          | (17.8)          |
| <b>Anti-CarP</b> |                  |                  |                  |                  |                  |                  |                             |                 |
| aU/mL            | 475.5            | (293.2 – 741.8)  | 148.7            | (0.0 – 376.0)    | 230.5            | (41.3 – 336.0)   | 241.0                       | (83.5 – 422.0)  |
| Positive         | <b>42</b>        | <b>(63.6) **</b> | 2                | (20.0)           | 6                | (20.0)           | 28                          | (27.7)          |
| <b>Anti-AL</b>   |                  |                  |                  |                  |                  |                  |                             |                 |
| aU/mL            | 15.4             | (4.7 – 33.4)     | 15.9             | (0.8 – 24.8)     | 9.9              | (0.2 – 28.0)     | 6.4                         | (0.0 – 10.0)    |
| Positive         | 13               | (19.7)           | 1                | (10.0)           | 6                | (20.0)           | 10                          | (9.9)           |

**Supplementary Figure 1: Patients with AILD present with double or triple positivity for different anti-PTM antibodies compared to non-AILD and define a group of AIH patients harboring three anti-PTM antibodies.** Upset plot indicating the frequency of combinations of anti-PTM antibodies in (A) non-AILD, (B) AILD, and (C) AIH. Horizontal bars represent the number of individuals in each of the anti-PTM antibodies of interest with a table on the right indicating single or combinations of anti-PTM antibodies. Vertical bars represent the number of patients positive for that anti-PTM antibody or combinations thereof.

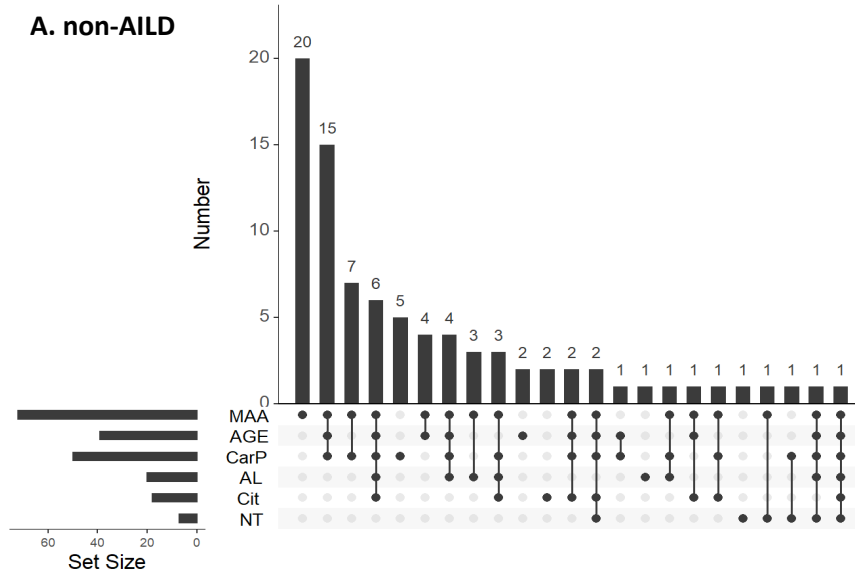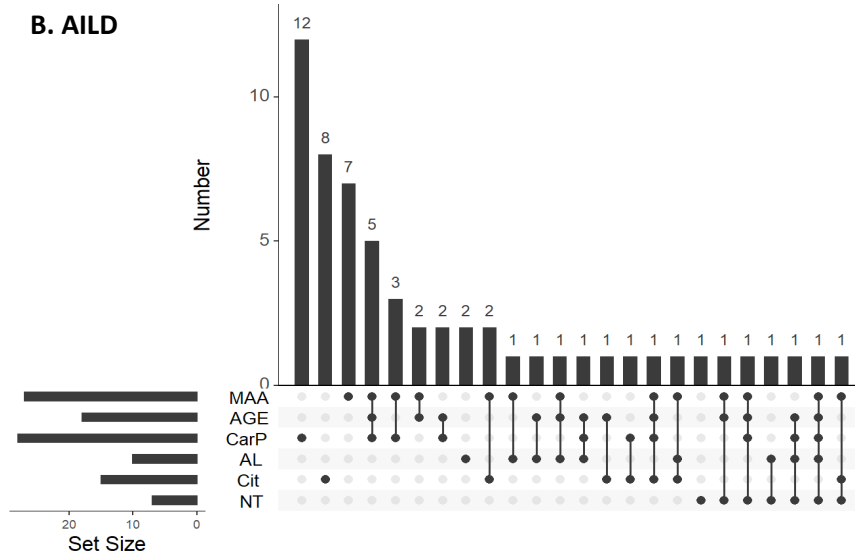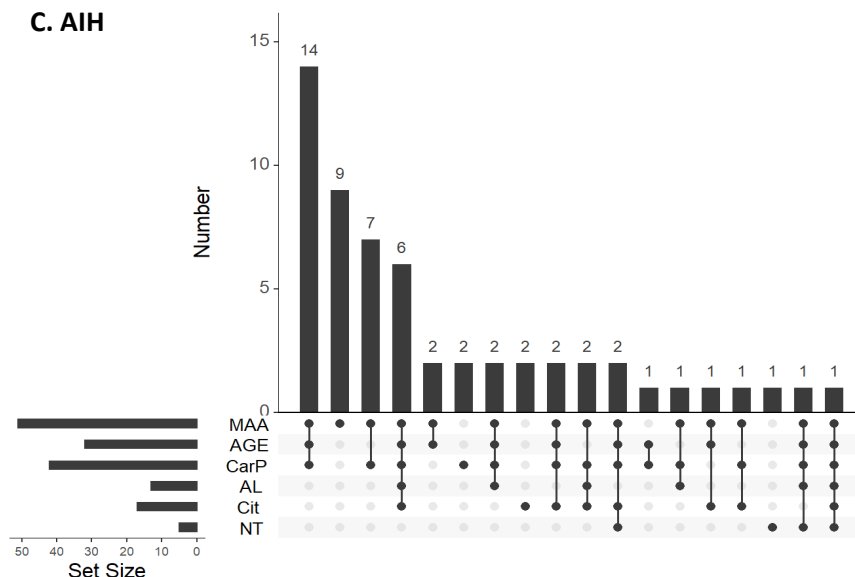

**Supplementary Table 4: Detailed overview of correlation coefficients (including 95% confidence intervals) as provided in Figure 5.** All confidence intervals were calculated using Fisher's transformation. *AGE*, advanced glycation end-product; *AI*, autoimmune; *AL*, acetylated protein; *ALAT*, alanine aminotransferase; *ALP*, alkaline phosphatase; *AMA*, anti-mitochondrial antibodies; *ANA*, anti-nuclear antibodies; *ASAT*, aspartate aminotransferase; *SMA*, anti-smooth muscle antibody; *CarP*, carbamylated protein; *CBR*, complete biochemical response; *CI*, confidence interval; *corr*, correlation coefficient; *IgG*, immunoglobulin gamma; *MAA*, malondialdehyde-acetaldehyde adduct; *LKM*, Liver Kidney microsomal antibody; *SLA*, soluble liver antigen.

|                          | <b>Anti-MAA</b> |              | <b>Anti-AGE</b> |              | <b>Anti-CarP</b> |              | <b>Anti-AL</b> |              |
|--------------------------|-----------------|--------------|-----------------|--------------|------------------|--------------|----------------|--------------|
|                          | corr            | 95% CI*      | corr            | 95% CI*      | corr             | 95% CI*      | corr           | 95% CI*      |
| <b>Demographics</b>      |                 |              |                 |              |                  |              |                |              |
| Age                      | 0.199           | -0.06 – 0.43 | 0.230           | -0.03 – 0.46 | 0.156            | -0.11 – 0.40 | -0.058         | -0.31 – 0.20 |
| Disease activity         |                 |              |                 |              |                  |              |                |              |
| Cirrhosis                | -0.36           | -0.29 – 0.22 | -0.183          | -0.43 – 0.09 | 0.055            | -0.21 – 0.31 | -0.163         | -0.42 – 0.12 |
| Self-reported arthralgia | 0.230           | -0.03 – 0.46 | 0.174           | -0.10 – 0.42 | 0.006            | -0.25 – 0.26 | 0.137          | -0.15 – 0.40 |
| Concurrent AI disease    | 0.110           | -0.15 – 0.36 | 0.095           | -0.18 – 0.35 | 0.110            | -0.16 – 0.36 | 0.019          | -0.26 – 0.30 |
| <b>Transaminases</b>     |                 |              |                 |              |                  |              |                |              |
| ALAT                     | 0.024           | -0.24 – 0.28 | 0.056           | -0.21 – 0.31 | 0.207            | -0.06 – 0.44 | 0.008          | -0.25 – 0.27 |
| ASAT                     | 0.139           | -0.13 – 0.38 | 0.135           | -0.13 – 0.38 | 0.348            | 0.09 – 0.56  | 0.137          | -0.13 – 0.38 |
| <b>(Auto)antibodies</b>  |                 |              |                 |              |                  |              |                |              |
| ANA                      | 0.420           | 0.18 – 0.61  | 0.075           | -0.19 – 0.33 | 0.272            | 0.01 – 0.49  | 0.143          | -0.14 – 0.40 |
| Anti-LKM1                | -               | -            | -               | -            | -                | -            | -              | -            |
| Anti-SLA                 | 0.290           | -0.03 – 0.51 | -0.093          | -0.39 – 0.23 | 0.229            | -0.08 – 0.49 | 0.128          | -0.21 – 0.43 |
| SMA                      | -0.013          | -0.31 – 0.29 | 0.015           | -0.25 – 0.28 | -0.154           | -0.40 – 0.11 | 0.140          | -0.14 – 0.40 |
| IgG                      | 0.529           | 0.29 – 0.70  | 0.248           | -0.03 – 0.49 | 0.435            | 0.18 – 0.63  | 0.182          | -0.10 – 0.43 |
| <b>Follow-up</b>         |                 |              |                 |              |                  |              |                |              |
| Time to CBR (years)      | -0.269          | -0.54 – 0.06 | -0.337          | -0.59 – 0.01 | -0.266           | -0.54 – 0.06 | -0.191         | -0.48 – 0.14 |
| CBR 3 months             | 0.322           | 0.06 – 0.54  | 0.291           | 0.02 – 0.52  | 0.179            | -0.09 – 0.42 | 0.260          | -0.03 – 0.50 |
| CBR 6 months             | 0.183           | -0.08 – 0.42 | 0.085           | -0.19 – 0.35 | 0.257            | -0.01 – 0.49 | 0.303          | 0.02 – 0.54  |
| CBR 12 months            | 0.328           | 0.07 – 0.54  | 0.386           | 0.12 – 0.59  | 0.341            | 0.08 – 0.55  | 0.270          | -0.02 – 0.51 |
| Liver transplantation    | 0.093           | -0.17 – 0.34 | 0.190           | -0.08 – 0.43 | 0.053            | -0.21 – 0.31 | 0.081          | -0.20 – 0.35 |
| Mortality                | 0.028           | -0.23 – 0.28 | 0.040           | -0.23 – 0.30 | 0.165            | -0.10 – 0.41 | -0.042         | -0.31 – 0.24 |

**Supplementary Table 5: Baseline characteristics of patients with AIH and at least 3 positive anti-PTM antibodies versus less than 3.**

Results are presented as n (%), mean  $\pm$ SD or median (IQR). *AIH*, autoimmune hepatitis; *ALAT*, alanine aminotransferase; *ASAT*, aspartate aminotransferase; *CBR*, complete biochemical response; *IgG*, immunoglobulin gamma.

|                                              | $\geq 3$ anti-PTM positive | $< 3$ anti-PTM positive | p-value |
|----------------------------------------------|----------------------------|-------------------------|---------|
| <b>Demographics</b>                          |                            |                         |         |
| Patients                                     | 32 (55.2)                  | 26 (44.8)               | -       |
| Female sex                                   | 24 (75.0)                  | 19 (73.1)               | 0.87    |
| Age diagnosis (years)                        | 47.7 ( $\pm$ 20.0)         | 44.8 ( $\pm$ 18.9)      | 0.571   |
| Simplified criteria for the diagnosis of AIH | 8.0 (6.0 – 8.0)            | 7.0 (5.8 – 8.0)         | 0.19    |
| Revised original criteria for AIH            | 17.9 ( $\pm$ 2.6)          | 15.3 ( $\pm$ 3.6)       | <0.05*  |
| Cirrhosis                                    | 12 (37.5)                  | 11 (42.3)               | 0.71    |
| Yes, compensated                             | 8 (25.0)                   | 6 (23.1)                | -       |
| Yes, decompensated                           | 4 (12.5)                   | 5 (19.2)                | -       |
| No cirrhosis                                 | 20 (62.5)                  | 15 (57.7)               | -       |
| Self-reported arthralgia                     | 7 (21.9)                   | 5 (19.2)                | 0.81    |
| Auto immune comorbidities                    | 11 (34.4)                  | 6 (23.1)                | 0.31    |
| <b>Laboratory</b>                            |                            |                         |         |
| ALAT                                         | 535.0 (186.0 – 1028.0)     | 333.0 (118.3 – 1136.0)  | 0.65    |
| ASAT                                         | 580.0 (190.8 – 989.3)      | 304.0 (111.3 – 827.8)   | 0.29    |
| IgG                                          | 28.8 (22.2 – 39.6)         | 21.0 (14.0 – 31.1)      | 0.02*   |
| <b>Treatment started</b>                     |                            |                         |         |
| Azathioprine                                 | 1 (3.1)                    | 0 (0.0)                 | -       |
| Budesonide                                   | 0 (0.0)                    | 2 (7.7)                 | -       |
| Budesonide + azathioprine                    | 2 (6.3)                    | 1 (3.8)                 | -       |
| Prednisolone                                 | 2 (6.3)                    | 1 (3.8)                 | -       |
| Prednisolone + azathioprine                  | 25 (78.1)                  | 20 (76.9)               | -       |
| Prednisolone + thioguanine                   | 1 (3.1)                    | 0 (0.0)                 | -       |
| Thioguanine                                  | 0 (0.0)                    | 1 (3.8)                 | -       |
| Unknown                                      | 1 (3.1)                    | 0 (0.0)                 | -       |
| No treatment started                         | 0 (0.0)                    | 1 (3.8)                 | -       |
| <b>Follow-up</b>                             |                            |                         |         |
| Duration of follow-up                        | 9.8 (4.9 – 18.2)           | 7.01 (4.0 – 12.26)      | 0.15    |
| Time to CBR (years)                          | 0.8 (0.3 – 2.3)            | 2.0 (0.8 – 4.1)         | 0.06    |
| CBR 3 months                                 | 8 (25.0)                   | 1 (3.8)                 | 0.03*   |
| CBR 6 months                                 | 9 (28.1)                   | 3 (11.5)                | 0.12    |
| CBR 12 months                                | 13 (40.6)                  | 3 (11.5)                | 0.01*   |
| Liver transplantation                        | 2 (6.3)                    | 1 (3.8)                 | 0.68    |
| Mortality during follow-up                   | 8 (25.8)                   | 5 (19.2)                | 0.60    |
| Switch in medication                         | 15 (46.9)                  | 10 (38.5)               | 0.36    |

**Supplementary Table 6: Correlations between change in anti-PTM antibody levels and changes in aminotransferases and immunoglobulin gamma (IgG).** All confidence intervals were calculated using Fisher’s transformation. *AGE*, advanced glycation end-product; *AL*, acetylated protein; *ALAT*, alanine aminotransferase; *ASAT*, aspartate aminotransferase; *CarP*, carbamylated protein; *CI*, confidence interval; *corr*, correlation coefficient; *IgG*, immunoglobulin gamma; *MAA*, malondialdehyde–acetaldehyde adduct.

|        | Δ Anti-MAA |         |            | Δ Anti-AGE |         |            | Δ Anti-CarP |         |            | Δ Anti-AL |         |            |
|--------|------------|---------|------------|------------|---------|------------|-------------|---------|------------|-----------|---------|------------|
|        | corr       | p-value | 95% CI*    | corr       | p-value | 95% CI*    | corr        | p-value | 95% CI*    | corr      | p-value | 95% CI*    |
| Δ ALAT | 0.1        | 0.6     | -0.3 – 0.5 | 0.28       | 0.2     | -0.1 – 0.6 | 0.2         | 0.4     | -0.2 – 0.5 | 0.4       | 0.0*    | 0.0 – 0.78 |
| Δ ASAT | 0.2        | 0.4     | -0.2 – 0.5 | 0.29       | 0.2     | -0.1 – 0.6 | 0.3         | 0.1     | -0.1 – 0.6 | 0.5       | 0.0*    | 0.18 – 0.7 |
| Δ IgG  | 0.3        | 0.3     | -0.2 – 0.7 | 0.6        | 0.007*  | 0.2 – 0.8  | 0.5         | 0.1     | 0.0 – 0.8  | 0.2       | 0.5     | -0.3 – 0.6 |
